# Supplementary material for: Identification of multiple binding sites for the THAP domain of the Galileo transposase in the long terminal inverted-repeats
Source: PubMed Central journal article supplement (PMC3688188; doi:10.1016/j.gene.2013.04.050), 2013-08-01

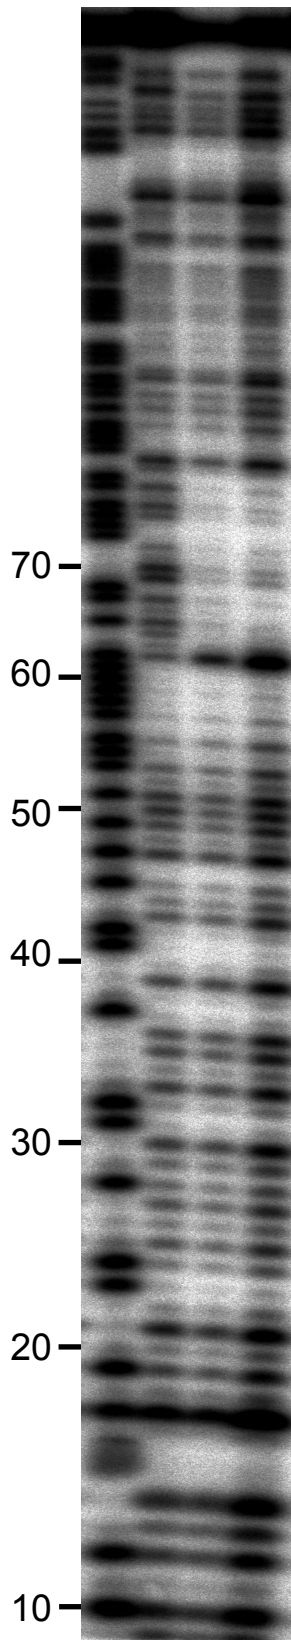

Supplement: mmc1.pdf [file mmc1.pdf]
